# Supplementary material
Source: PubMed Central journal article supplement (PMC4910532)
Supplement: EMBJ-35-1298-s002.pdf [file EMBJ-35-1298-s002.pdf]

**Table EV1. Quality of sequencing samples**

Table shows details of the sequenced samples generated in this study. Replicates are biological replicates. Numbers following underscores link H3K27me3, H3K9me2 and H3K27m1 ChIP samples with their corresponding H3 and input samples.

| Sample Details                  | total TRIMMED reads | mapped reads | map efficiency % | n of reads after deduplication | Col specific reads | Ler specific reads | Observed Col reads / Total | Expected Col reads / Total | % Contamination (C) |
|---------------------------------|---------------------|--------------|------------------|--------------------------------|--------------------|--------------------|----------------------------|----------------------------|---------------------|
| <b>cross (Col x Ler)</b>        |                     |              |                  |                                |                    |                    |                            |                            |                     |
| Input_1 Replicate 1             | 24,787,822          | 16,116,996   | 65.0             | 12,411,796                     | 2,018,223          | 899,761            | 0.69                       | 0.66                       | 3.9                 |
| H3_1 Replicate 1                | 30,350,422          | 21,208,631   | 69.9             | 15,622,026                     | 2,526,185          | 1,053,964          | 0.71                       | 0.66                       |                     |
| H3K27me3_1 Replicate 1          | 24,167,338          | 15,397,847   | 63.7             | 12,168,470                     | 2,228,295          | 757,833            | 0.75                       | 0.66                       |                     |
| Input_2 Replicate 1             | 29,511,597          | 20,368,028   | 69.0             | 15,508,128                     | 2,654,606          | 1,019,155          | 0.72                       | 0.66                       | 9.2                 |
| H3_2 Replicate 1                | 22,424,269          | 16,041,830   | 71.5             | 10,987,746                     | 1,781,000          | 683,120            | 0.72                       | 0.66                       |                     |
| H3K9me2_2 Replicate 1           | 22,810,664          | 10,583,269   | 46.4             | 7,366,446                      | 1,406,695          | 499,526            | 0.74                       | 0.66                       |                     |
| H3K27me1_2 Replicate 1          | 26,332,484          | 14,079,291   | 53.5             | 9,383,672                      | 1,691,799          | 670,240            | 0.72                       | 0.66                       |                     |
| Input_1 Replicate 2             | 31,577,892          | 20,599,337   | 65.2             | 13,163,007                     | 2,180,612          | 936,117            | 0.70                       | 0.66                       | 5.2                 |
| H3_1 Replicate 2                | 22,046,368          | 15,824,550   | 71.8             | 13,929,052                     | 2,260,008          | 970,079            | 0.70                       | 0.66                       |                     |
| H3K27me3_1 Replicate 2          | 25,449,421          | 17,581,951   | 69.1             | 14,361,535                     | 2,677,102          | 912,337            | 0.75                       | 0.66                       |                     |
| Input_2 Replicate 2             | 34,745,820          | 23,807,143   | 68.5             | 20,900,785                     | 3,646,187          | 1,318,711          | 0.73                       | 0.66                       | 11.3                |
| H3_2 Replicate 2                | 39,063,203          | 28,213,681   | 72.2             | 23,886,553                     | 4,045,037          | 1,462,567          | 0.73                       | 0.66                       |                     |
| H3K9me2_2 Replicate 2           | 39,513,738          | 14,425,995   | 36.5             | 11,285,270                     | 2,257,687          | 740,785            | 0.75                       | 0.66                       |                     |
| H3K27me1_2 Replicate 2          | 38,767,698          | 18,277,539   | 47.1             | 15,327,137                     | 2,895,097          | 1,086,645          | 0.73                       | 0.66                       |                     |
| <b>cross (Ler x Col)</b>        |                     |              |                  |                                |                    |                    |                            |                            |                     |
| Input_1 Replicate 1             | 18,078,217          | 11,661,930   | 64.5             | 8,383,298                      | 608,775            | 1,469,701          | 0.29                       | 0.33                       | 6.5                 |
| H3_1 Replicate 1                | 13,096,461          | 8,932,081    | 68.2             | 7,612,629                      | 531,600            | 1,306,479          | 0.29                       | 0.33                       |                     |
| H3K27me3_1 Replicate 1          | 13,950,783          | 8,654,509    | 62.0             | 7,429,692                      | 493,761            | 1,493,996          | 0.25                       | 0.33                       |                     |
| Input_2 Replicate 1             | 34,085,923          | 21,914,585   | 64.3             | 17,357,154                     | 1,376,384          | 2,984,119          | 0.32                       | 0.33                       | 2.7                 |
| H3_2 Replicate 1                | 30,875,744          | 21,108,773   | 68.4             | 16,437,148                     | 1,248,844          | 2,748,956          | 0.31                       | 0.33                       |                     |
| H3K9me2_2 Replicate 1           | 28,052,613          | 9,224,657    | 32.9             | 6,900,284                      | 683,606            | 1,479,156          | 0.32                       | 0.33                       |                     |
| H3K27me1_2 Replicate 1          | 29,958,359          | 14,180,901   | 47.3             | 10,279,629                     | 953,806            | 1,841,390          | 0.34                       | 0.33                       |                     |
| Input_1 Replicate 2             | 39,484,632          | 25,263,787   | 64.0             | 20,968,361                     | 1,596,121          | 3,680,170          | 0.30                       | 0.33                       | 4.8                 |
| H3_1 Replicate 2                | 40,133,143          | 27,482,291   | 68.5             | 21,624,259                     | 1,563,126          | 3,659,101          | 0.30                       | 0.33                       |                     |
| H3K27me3_1 Replicate 2          | 42,779,941          | 24,985,487   | 58.4             | 18,030,487                     | 1,223,283          | 3,773,456          | 0.24                       | 0.33                       |                     |
| H3K9me2_1 Replicate 2           | 33,037,695          | 11,650,082   | 35.3             | 8,829,379                      | 849,536            | 1,833,631          | 0.32                       | 0.33                       |                     |
| H3K27me1_1 Replicate 2          | 40,121,446          | 20,839,556   | 52.0             | 17,170,073                     | 1,482,845          | 3,058,591          | 0.33                       | 0.33                       |                     |
| <b>vegetative tissue (leaf)</b> |                     |              |                  |                                |                    |                    |                            |                            |                     |
| Input_1_leaf Replicate 1        | 19,616,055          | 14,544,525   | 74.1             | 13,236,908                     |                    |                    |                            |                            |                     |
| H3_1_leaf Replicate 1           | 14,160,938          | 10,297,487   | 72.7             | 9,836,187                      |                    |                    |                            |                            |                     |
| H3K27me3_1_leaf Replicate 1     | 23,671,839          | 19,162,954   | 81.0             | 16,650,370                     |                    |                    |                            |                            |                     |
| H3K9me2_1_leaf Replicate 1      | 20,218,154          | 10,429,703   | 51.6             | 9,540,874                      |                    |                    |                            |                            |                     |
| Input_2_leaf Replicate 1        | 31,058,139          | 17,380,018   | 56.0             | 7,716,027                      |                    |                    |                            |                            |                     |
| H3_2_leaf Replicate 1           | 34,708,175          | 19,836,909   | 57.2             | 15,430,233                     |                    |                    |                            |                            |                     |
| H3K27m1_2 Replicate 1           | 30,339,670          | 10,142,645   | 33.4             | 6,045,970                      |                    |                    |                            |                            |                     |
| Input_1_leaf Replicate 2        | 18,931,702          | 14,086,197   | 74.4             | 12,584,084                     |                    |                    |                            |                            |                     |
| H3_1_leaf Replicate 2           | 21,762,984          | 15,997,167   | 73.5             | 15,062,569                     |                    |                    |                            |                            |                     |
| H3K27me3_1_leaf Replicate 2     | 15,906,872          | 13,892,998   | 87.3             | 11,877,197                     |                    |                    |                            |                            |                     |
| H3K9me2_1_leaf Replicate 2      | 13,192,610          | 5,057,922    | 38.3             | 4,388,003                      |                    |                    |                            |                            |                     |
