# Supplementary material
Source: PubMed Central journal article supplement (PMC4910532)
Supplement: EMBJ-35-1298-s007.pdf [file EMBJ-35-1298-s007.pdf]

### Table EV6. Replicability assessment of ChIP-seq samples

Table shows Pearson correlation coefficients for every pair of replicates and their inputs.

|                           | H3K27me1<br>Endosperm<br>(Col x Ler) | H3K27me1<br>Endosperm<br>(Ler x Col) | H3K27me3<br>Leaves<br>(Col x Col) | H3K27me3<br>Endosperm<br>(Col x Ler) | H3K27me3<br>Endosperm<br>(Ler x Col) | H3K9me2<br>Leaves<br>(Col x Col) | H3K9me2<br>Endosperm<br>(Col x Ler) | H3K9me2<br>Endosperm<br>(Ler x Col) |
|---------------------------|--------------------------------------|--------------------------------------|-----------------------------------|--------------------------------------|--------------------------------------|----------------------------------|-------------------------------------|-------------------------------------|
| Methylated H3 replicate 2 | 0.91                                 | 0.91                                 | 0.98                              | 0.87                                 | 0.90                                 | 0.69                             | 0.94                                | 0.97                                |
| H3                        | 0.36                                 | 0.42                                 | 0.28                              | 0.39                                 | 0.49                                 | 0.34                             | 0.12                                | 0.01                                |
| Input                     | 0.34                                 | 0.41                                 | 0.14                              | 0.35                                 | 0.43                                 | 0.07                             | 0.24                                | 0.15                                |
