# Supplementary material
Source: PubMed Central journal article supplement (PMC4910532)
Supplement: EMBJ-35-1298-s008.pdf [file EMBJ-35-1298-s008.pdf]

**Table EV7. Primers used in CHIP-qPCR**

---

|                   |                              |                                |
|-------------------|------------------------------|--------------------------------|
| <i>ACTIN7</i>     | TGGTTTTGCTGGTGATGATG         | CCATGACACCAGTGTGCCTA           |
| <i>AGAMOUS</i>    | GGGAGAGAGTAAGGAAGGACTATGAGGT | GACACAGACATTAACAACAATGGAGGATGG |
| <i>PHE1</i>       | AGAAAATGATTCAGTGAGGAAAACAA   | CGGATGACCGCACATGC              |
| <i>MU1</i>        | TTGTGAGCATTCTTATGGTGCTA      | TGTCGAGAAGAACTCGGATATG         |
| <i>AT2TE37050</i> | TTGTTGGTTCCTCTCTGATACCT      | ACGACCGTGAGACAGTAGGC           |
| <i>AT5TE49450</i> | CTGACAACGAATGACAAAGGG        | GAAAGGTGACGGGAGTAGAC           |
| <i>AT5TE41795</i> | CTTCTACCGAGTATCTACCTG        | ATGTTCTTCCCATAACCTG            |
| <i>AT3TE53985</i> | TACCGAGATTAGACCTAACC         | TTCAAAGATGCTCCAGACAG           |

---
